**Full title: Improving neglected tropical disease services and integration into primary healthcare in Southern Nations, Nationalities and People's Region (SNNPR), Ethiopia: results from a mixed methods intervention evaluation**

**Short title: Integrating improved NTDs into primary healthcare**

**Authors:** Laura Donovan<sup>1</sup>, Tedila Habte<sup>2</sup>, Esey Batisso<sup>2</sup>, Dawit Getachew<sup>2</sup>, Ann-Sophie Stratil<sup>1</sup>, Agonafer Tekalegne<sup>2</sup>, Fikre Seife<sup>3</sup>, Damen Mariam<sup>4</sup>, Kevin Baker<sup>1,5</sup>

1. Malaria Consortium, London, United Kingdom.
2. Malaria Consortium, Addis Ababa, Ethiopia.
3. Ministry of Health, Addis Ababa, Ethiopia.
4. Addis Ababa University, Addis Ababa, Ethiopia.
5. Department of Global Public Health, Karolinska Institute, Stockholm, Sweden.

Corresponding author: Dr Kevin Baker, [k.baker@malariaconsortium.org](mailto:k.baker@malariaconsortium.org)

1 **Abstract (250-300 words)**

2 **Background:** Ethiopia is one of the countries with the highest burden of neglected tropical diseases  
3 (NTDs), with 16 of 20 recognised NTDs considered a public health problem, twelve of which have  
4 been identified as public health priorities by the Ethiopian Federal Ministry of Health. However, until  
5 recently NTDs have not received adequate attention at national and subnational levels in the  
6 country.

7 **Methods:** This study was conducted in Damot Gale district, Wolaita Zone in (Southern Nation  
8 Nationalities Peoples Region) SNNPR, Ethiopia and used a mixed methods approach to evaluate an  
9 intervention integrating four common NTDs (trachoma, lymphatic filariasis, schistosomiasis and  
10 podoconiosis) into Ethiopia's primary healthcare system. The intervention consisted of adapted job  
11 aids, supportive supervision, and improved supplies of medical tools to improve diagnosis,  
12 management and reporting.

13 **Results:** found that the intervention was successful at improving the detection, management and  
14 reporting across the four common NTD's included and had a high level of acceptance from health  
15 workers. The intervention demonstrated cost-effectiveness.

16 **Conclusion:** The findings highlight the need for further investment and consideration of integrating  
17 and scaling up NTD interventions at the primary healthcare level in Ethiopia, demonstrating that  
18 providing a package of interventions to support integration can be a cost-effective method.

## 19 **Author Summary (150-200 non-technical summary of the work)**

20 Building on the findings of a previous small-scale operational study and formative phase, this study  
21 involved implementing an intervention to integrate the prevention, diagnosis, management and  
22 reporting of four common NTDs — trachoma, lymphatic filariasis, schistosomiasis and podoconiosis  
23 — into Ethiopia’s primary healthcare system. The intervention consisted of providing health workers  
24 with adapted job aids, supportive supervision and improved diagnostic and medical supplies to  
25 facilitate NTD diagnosis, management, and reporting. It was implemented for six months in one  
26 hospital, one health centre and five health posts in Damot Gale district, Ethiopia and the feasibility,  
27 acceptability and cost-effectiveness were evaluated. Results indicate that the capacity of all enrolled  
28 health facilities for detecting, managing, and recording target NTDs improved over time. The use of  
29 intervention materials by health workers also increased over time. The intervention tools proved to  
30 be highly acceptable to health workers who viewed them as helpful, relevant, and easy to use. The  
31 findings highlight that providing a package of interventions to support integration can be a cost-  
32 effective method and that the integration and scale of NTD interventions at the primary healthcare  
33 level in Ethiopia should be considered.

## 34 Introduction

35 Neglected tropical diseases (NTDs) are a diverse group of diseases that are mainly prevalent in tropical  
36 areas, with over 40% of the global NTD burden concentrated in sub-Saharan Africa [1]. NTDs affect  
37 more than 1.5 billion of the world's population, particularly communities with higher poverty rates,  
38 and women and children [1]. In recent years, the global development community has come together  
39 to tackle the burden of NTDs, agreeing on an ambitious NTD roadmap [2]. Reducing NTD morbidity  
40 and mortality is formally recognised as a target for global action in SDG 3.3, which calls to 'end the  
41 epidemics of [...] neglected tropical diseases' to 'ensure healthy lives and well-being for all at all ages'  
42 [3]. Although a great deal has been achieved by NTD programmes during the past decade, progress  
43 towards achieving NTD and universal health coverage (UHC) targets will depend on bringing NTD  
44 programmes, functions and activities into the mainstream of broader health systems. In addition,  
45 efforts to innovate and intensify the management of NTDs must focus on ensuring that these diseases  
46 are detected and managed within primary healthcare systems [1]. The 2030 NTD global roadmap also  
47 reaffirms the importance of integrating efforts across NTDs and within national health systems in the  
48 context of UHC and coordinating stakeholders in NTDs and related areas [4].

49 Ethiopia is one of the countries with the highest burden of NTDs, with 16 of 20 recognised NTDs  
50 considered a public health problem, twelve of which have been identified as public health priorities  
51 by the Ethiopian Federal Ministry of Health [5]. However, NTDs have not received adequate attention  
52 at national and subnational levels in the country until recently. The Ethiopian Third National NTD  
53 Strategic Plan (2021-2025) lists the mainstreaming of NTDs into the routine healthcare delivery system  
54 as a cross-cutting and strategic priority [6]. In addition, nationwide NTD mapping has been conducted,  
55 control interventions for the various NTDs – including mass drug administration – have been scaled  
56 up, and a post-treatment surveillance system and strong NTD research forum have been established  
57 [7].

58 This study evaluated an intervention which integrates NTDs into primary healthcare. The intervention  
59 focused on strengthening the detection, management, recording and reporting of four NTDs;

60 trachoma, lymphatic filariasis, schistosomiasis and podoconiosis. These NTDs were selected due to  
61 being identified as public health priorities in Ethiopia [5]. Although these NTDs differ in their  
62 transmission and management, there is overlap in the populations they affect, and the presentation  
63 of these diseases can lead to stigma [8][9][10]. Nationwide mapping exercises conducted between  
64 2013 and 2017 revealed 412 national districts and 70 districts in (Southern Nation Nationalities  
65 Peoples Region) SNNPR were endemic for schistosomiasis [11]. Preventative chemotherapy, prompt  
66 diagnosis and treatment of schistosomiasis, as well as access to clean water and good hygiene  
67 practices, can help to reduce transmission. Ethiopia is also the most trachoma-endemic country in  
68 sub-Saharan Africa, with a prevalence of active trachoma of 25.9% and blinding trachoma of 1.5% in  
69 the Southern Nations Nationalities and Peoples' Region (SNNPR) in 2016 [12]. Trachoma can be  
70 treated with antibiotics but in the case of repeated infection and if left untreated the disease can lead  
71 to blindness. Prompt treatment of trachoma and good hygiene practices can help to reduce  
72 transmission. Both lymphatic filariasis, caused by infection with filarial parasites, and podoconiosis, a  
73 non-infectious disease, can lead to the abnormal enlargement of body parts, causing pain and severe  
74 disability. Nationwide mapping exercises conducted in 2017 revealed 71 national-level districts and  
75 24 regional-level districts were lymphatic filariasis-endemic [13]. Lymphatic filariasis preventative  
76 treatments are used to prevent infections but once the disease has progressed management of  
77 swelling in affected areas is the only option. As of 2021, the average prevalence of podoconiosis in  
78 Ethiopia was 4% (an estimated 1.56 million cases), with the highest prevalence in SNNPR (8.3%) [14].  
79 Treatment for this disease is limited to lymphoedema management. For each of these NTDs  
80 management can help to alleviate suffering and reduce stigma associated with the presentation of  
81 some of these diseases.

82 A previous small-scale operational research study was conducted in 2018 and provided the basis for  
83 this larger study, conducted between 2019 and 2021 [15]. This study comprised of two phases a  
84 formative phase and an intervention phase. The formative phase identified gaps in the integration of  
85 NTD services in the Ethiopian primary healthcare system and was used to inform the development of

86 a tailored, multi-component intervention. Data collected during the formative phase provided a  
87 baseline for evaluating the health system capacity component. The intervention phase piloted the  
88 intervention in selected health facilities for six months and evaluated for feasibility, acceptability, and  
89 implementation cost. This paper presents the results of this evaluation and outlines recommendations  
90 to ensure the sustainability of future NTD service integration within the Ethiopian primary healthcare  
91 system.

## 92 **Methods**

### 93 **Study setting**

94 The study was conducted in Damot Gale district, Wolaita Zone in SNNPR, Ethiopia. This district was  
95 selected due to the endemicity of the four target NTDs and operational feasibility due to the proximity  
96 to Malaria Consortium's sub-country office in Hawassa. Damot Gale is located 350 km south of  
97 Ethiopia's capital, Addis Ababa, and 153 km southwest of Hawassa. The district is mainly rural and is  
98 subdivided into 31 *kebeles*, with a population of approximately 183,720 as of 2017 [14][16]. Within  
99 Damot Gale, Boditi primary hospital, Buge health centre and five rural health posts were selected to  
100 implement the intervention. Inclusion criteria included having an adequate health workforce, access  
101 to electricity, clean water and sanitation, no enrolment in other research studies and not receiving  
102 support from non-governmental organisations.

103

### 104 **Study design**

105 The aim of this study was to evaluate the package of interventions developed to support the  
106 integration of four common NTDs into the health system. The package of interventions included:  
107 clearly outlining staff roles and responsibilities, providing clear and harmonized NTD case definitions,  
108 providing job aids for integrated NTD detection and management, introducing sensitive diagnostic  
109 tests for intestinal schistosomiasis, training for health workers and Health Extension Workers

110 (HEWs), provision of drugs and medical supplies, inclusion of NTD supervision tools, indicators for  
111 suspected targeted NTDs and social and behaviour change communication (SBCC) materials.

112 The intervention was evaluated using a mixed methods approach to determine the feasibility,  
113 acceptability and cost-effectiveness. The evaluation comprised of:

- 114 • Two observational assessments; one immediately after the health worker training, and one  
115 after the six-month intervention pilot. These aimed to determine the proportion change in  
116 NTD assessments demonstrating adequate knowledge of target NTDs by health workers and  
117 their use of the intervention materials.
- 118 • A health system capacity assessment to evaluate changes in the capacity of the study health  
119 facilities to detect, manage, record and report target NTDs.
- 120 • The collection and analysis of routine monitoring and evaluation (M&E) data from the study  
121 health facilities to identify any changes in NTD prevalence and service delivery post-  
122 intervention.
- 123 • Key informant interviews (KIIs) with health workers, HEWs, health development army  
124 members (HDAs) and community members to elicit their perceptions of the intervention's  
125 reach, fidelity, acceptability and feasibility.
- 126 • A cost-effectiveness analysis to determine the intervention's value for money.

127

## 128 **Data collection and analysis**

129 Baseline data were collected during the formative phase and in April 2021 immediately after the  
130 health worker training. Endline data were collected in October 2021 six-months after the start of the  
131 intervention. Data collection procedures and data collector training were compliant with national  
132 COVID-19 prevention guidelines, with all participants wearing a facemask, maintaining physical  
133 distancing, washing hands frequently and regularly disinfecting materials. All data collectors had a first

134 degree or higher, experience within the Ethiopian healthcare system and spoke Amharic, English and  
135 Wolaytegna.

### 136 **Observational assessments**

137 43 patients with signs and symptoms of target NTDs were enrolled and participated in the baseline  
138 observation assessment in April 2021. In the endline observation assessment, conducted in October  
139 2021, a total of 129 patients with signs and symptoms of target NTDs were enrolled and  
140 participated. Data for the observational assessments was collected by a trained research assistant  
141 observing health workers during patient consultations. To assure data quality, data collectors  
142 participated in a three-day training beforehand which included a pre-test of the observation  
143 checklists. During each consultation the research assistant observed and recorded data using a  
144 checklist developed for each facility type. The research assistant recorded the signs and symptoms  
145 the patient presented with, patient history, the type of diagnosis or test (clinical examination,  
146 laboratory test) received, the health worker's diagnosis, the health worker's recommendations in  
147 terms of disease management (treatment, follow-up, home management), the treatment  
148 prescribed, if the patient was referred, if the health worker recorded the diagnosis and the services  
149 provided, and if the health worker consulted any guidelines or reference documents during the  
150 consultation.

151 Baseline and endline observational assessment data were quantitatively analysed using SPSS to  
152 determine the changes in health workers' knowledge during patient consultations, adherence to  
153 intervention procedures, health worker ability to detect NTDs and the acceptability of the  
154 intervention tools.

### 155 **Health system capacity assessment**

156 The health system capacity assessments were conducted by two trained data collectors. Structured  
157 questionnaires were used which covered the health facility profile and the following areas related to  
158 NTDs: general infrastructure, supervision, drugs and equipment, laboratory infrastructure and  
159 equipment, guidelines and job aids, health personnel, training and recording and reporting. Two



160 questionnaires were used: one for Boditi hospital and Buge health centre and one for the health posts.  
161 Health posts do not have a laboratory and so questions on laboratory infrastructure and equipment  
162 were omitted. The questionnaires were input into the data collection app CommCare and data were  
163 collected electronically using tablets. To assure data quality, data collectors' skills were evaluated  
164 during a pilot prior to data collection, data submitted in CommCare were checked daily and standard  
165 operating procedures (SOPs) were developed to ensure consistency in data entry. Health system  
166 capacity assessment data were exported from CommCare into Excel for analysis. The data were  
167 analysed quantitatively and qualitatively based on the designed relevant six thematic areas: general  
168 infrastructure, supervision, drugs and equipment, laboratory infrastructure and equipment, guidelines  
169 and job aids, and training.

#### 170 **Routine M&E data**

171 Routine NTD M&E data were retrieved from health facility records, which are captured using two  
172 separate forms: one for diseases and one for service delivery, both through a DHIS2 tool. As HEWs are  
173 not tasked with NTD reporting, reporting forms were prepared by the research team for HEWs to  
174 report suspected target NTDs. Results from schistosomiasis-related laboratory tests were also  
175 recorded before and after the introduction of the intervention. Routine M&E data were analysed  
176 quantitatively by inputting the collected data into Excel. The analysis was done based on data collected  
177 on laboratory tests, disease reports related to target NTDs (DHIS2), service delivery reports related to  
178 target NTDs (DHIS2) and a parallel data reporting form developed by the research team.

#### 179 **KIIs**

180 KIIs were conducted in October 2021 with 10 HEWs from five health posts (2 per health post), 8 health  
181 workers (4 from health centre and 4 from hospital level), 4 laboratory technicians (2 from health  
182 centre and 2 from hospital level), 2 data managers (1 from health centre and 1 from hospital level)  
183 and 5 HDA members. All participants were involved in either the detection, management or recording  
184 and reporting of NTDs at their health facility and were exposed to the intervention during  
185 implementation. KIIs were also held with male and female community members; 6 people living with

186 disability caused by a target NTD and 6 living without disability. Topic guides were designed to explore  
187 participant perceptions of the reach, fidelity, acceptability and feasibility of the intervention, including  
188 their knowledge of the four target NTDs and their control. Health worker KIIs took place at their  
189 respective health facility and community member KIIs were held in a neutral space such as a school.  
190 All KIIs were conducted by trained data collectors. To ensure data quality, all data collection  
191 procedures and tools were piloted for one day, with separate pilots for each local language. KIIs were  
192 conducted in the participant's preferred language (Amharic, English or Wolategna) and audio recorded  
193 using a digital recorder.

194 Community-level key informants were identified and selected through convenience sampling, based  
195 on their availability and willingness to participate. Health system-level informants were identified and  
196 selected by the Malaria Consortium team based in Hawassa on the basis of their role and experience  
197 of working on NTDs within the Ethiopian primary healthcare system.

198 A thematic analysis was conducted for data collected during KIIs [17]. Audio recordings were  
199 transcribed verbatim and translated into English where applicable. For those KIIs not conducted in  
200 English, data quality and translation accuracy were assured by checking a sample of the transcripts  
201 and backtranslating these into the local language. Transcripts were read to generate a coding list,  
202 which was then applied to all transcripts. The software MAXQDA 2020 was used to manage, code and  
203 retrieve data. Potential themes were identified and data relevant to each theme were collated; these  
204 were then discussed among the research team before final consolidation. Theme names were agreed  
205 by the research team and each theme description was refined and substantiated with compelling  
206 participant quotes.

### 207 **Cost-effectiveness**

208 A cost-effectiveness analysis was conducted to measure the resource flow or total value of resources  
209 used to improve NTD services through integration into primary healthcare. A cost-effectiveness  
210 analysis compares an intervention's costs to its outcomes. It expresses outcomes in natural health  
211 units, in this case the proportion change in terms of primary healthcare capacity in detecting and

212 managing target NTDs through the introduction of the intervention, as well as the system's capacity  
213 to produce relevant, timely and accurate data with regard to disease burden. The ratio of net  
214 programmatic costs vs. net programmatic effects was determined and the costs incurred per  
215 disability-adjusted life year (DALY) averted with that of the current gross domestic product (GDP) per  
216 capita compared.

217 The TreeAge Pro 2021 software was used for the cost-effectiveness analysis. The software constructs  
218 a decision analytic model with a Markov process to estimate the programmatic costs incurred and  
219 the health impacts (in terms of DALYs averted) within the project. The decision tree model follows a  
220 series of steps to construct a tree structure under uncertainty for alternative options and selects the  
221 least expected cost per effect as the best alternative among the constructed steps.

## 222 **Informed consent and ethical considerations**

223 Prior to the observation assessments and KIIs, participants were given an information sheet and  
224 consent form to read which included information on the withdrawal of consent at any point and the  
225 contact details of the study coordinator. Participants were allowed up to an hour to confirm their  
226 participation and were guided through the information sheet to assist their decision. For illiterate  
227 participants, data collectors read the information sheet and consent form aloud in the local language  
228 and confirmed their consent to participate by marking their digital fingerprint.

229 To ensure participant confidentiality and data authenticity, audio files and transcriptions of KIIs were  
230 kept in secure, locked cabinets, accessible by the Malaria Consortium research study team. Paper  
231 consent forms and KII topic guides were stored in opaque carriers at all times. A unique identification  
232 code was used to anonymise subject data (e.g. 1001) and subject identifiers were not used on data  
233 forms or during KIIs. Data stored in electronic formats were password protected.

234 This study was approved in June 2020 by the SNNPR Public Health Institute Research Ethical  
235 Committee. However, implementation of study activities was delayed due to COVID-19-related  
236 restrictions imposed by the Ethiopian government. To address these delays, an amendment

237 agreement between The Task Force for Global Health and Malaria Consortium was signed for a costed  
238 extension of the project by nine months until December 2021.

## 239 Results

### 240 Observational assessment of service providers

241 43 patients with signs and symptoms of the four target NTDs were enrolled and participated in the  
242 baseline observation assessment. In the endline observation assessment, a total of 129 patients with  
243 signs and symptoms of target NTDs were enrolled and participated. The participant characteristics are  
244 summarised in supplementary information Table 1.

#### 245 *Adherence to intervention procedures*

246 The proportion of each of the five assessment stages (outlined in table 1) was used to calculate the  
247 proportion of NTD assessments demonstrating adherence to intervention procedures by health  
248 workers at baseline compared to endline. At endline, proportion change improvement, which ranged  
249 from 20% to 53%, was shown in four out of the five assessment stages, compared to the baseline. The  
250 proportion of one assessment stage, 'appropriate application of examination procedures', showed a  
251 minor decrement (-1%) at endline compared to baseline.

252 Table 1. Proportion of assessment stages conducted at baseline and endline.

| Assessment stage                                                          | Baseline (%) | Endline (%)    | Percentage point difference (%) |
|---------------------------------------------------------------------------|--------------|----------------|---------------------------------|
| Appropriate consideration of NTDs                                         | 29/43 (67.4) | 114/129 (88.4) | 21.0                            |
| Consultation of job aid during assessment                                 | 26/43 (60.5) | 108/129(83.7)  | 23.2                            |
| Use of appropriate job aid for the age group                              | 26/43 (60.5) | 104/129 (80.6) | 20.1                            |
| Linking of iCCM/IMNCI guidelines with NTD job aid for children under five | 1/4 (25.0)   | 14/18 (77.8)   | 52.8                            |
| Appropriate application of examination procedures                         | 36/43 (83.7) | 107/129 (82.9) | -0.8                            |

253

254 **Health system capacity assessment**

255 Table 2 summarises the results of the health system capacity assessment conducted before and after  
 256 the intervention pilot at Boditi primary hospital, Buge health centre and the five rural health posts.  
 257 Overall, there was a marked increase in the capacity of the primary healthcare system to detect,  
 258 manage and record NTDs post-intervention implementation. More attention was given to the  
 259 integration of NTDs into routine services, which previously only focussed on mass drug administration  
 260 (MDA).

261 **Table 2. Results of health system capacity assessment pre- and post-intervention implementation.**

| Assessment area                                        | Pre-intervention                                                                                                    | Post-intervention                                                                                                                                                                        |
|--------------------------------------------------------|---------------------------------------------------------------------------------------------------------------------|------------------------------------------------------------------------------------------------------------------------------------------------------------------------------------------|
| General infrastructure                                 | *No dedicated triage room for NTDs<br>*Trichiasis surgery not available                                             | *Dedicated triage room created<br>*Trichiasis surgery available and 5 surgeries performed                                                                                                |
| Supervision                                            | *†# Supervision checklists did not address target NTDs                                                              | *†# Supervision checklists developed by the study that address target NTDs routinely used                                                                                                |
| Drugs and equipment                                    | *†# No drugs or equipment available for treatment of target NTDs and management of lymphedema                       | *† Some drugs and equipment for the treatment of target NTDs and management of lymphedema available, as provided by the study<br>Lymphedema management initiated (*) and intensified (†) |
| Laboratory infrastructure and equipment (* and † only) | *† No circulating cathodic antigen (CCA) diagnostic tests available for schistosomiasis (only wet mount microscopy) | *† CCA tests made available by the study and routinely used, with an increase in detected cases recorded                                                                                 |
| Guidelines and job aids                                | *†# No job aids and case definitions on target NTDs available                                                       | *†# Job aids on target NTD detection, management and recording and case definitions available and routinely used, as developed by the study<br>*†# Guidelines for CCA tests available    |

| Assessment area | Pre-intervention                                                                                                                                                                                                                                       | Post-intervention                                                                                                                                            |
|-----------------|--------------------------------------------------------------------------------------------------------------------------------------------------------------------------------------------------------------------------------------------------------|--------------------------------------------------------------------------------------------------------------------------------------------------------------|
| Training        | <p>*Only 2 doctors attended training on lymphedema management and prevention</p> <p>† Only 1 health officer and 1 clinical nurse attended trichiasis surgery training</p> <p># Most HEWs trained only on trachoma clinical diagnosis and treatment</p> | 40 health personnel (*), 29 health personnel (†) and 9 HEWs (#) attended comprehensive training on target NTDs, as organised and delivered by the study team |

262 \*Boditi hospital, † Buge health centre, #Health post

### 263 **Routine M&E data collection and analysis**

264 Retrieved routine laboratory data related only to intestinal schistosomiasis as the intervention  
 265 assigned point-of-care circulating cathodic antigen (CCA) diagnostic tests for this NTD at the hospital  
 266 and health centre level. Prior to the intervention pilot, which took place from July to September 2021,  
 267 these health facilities used microscopy for schistosomiasis detection in wet mount stool samples. In  
 268 Boditi hospital, before the intervention pilot, of the total 942 stool samples taken with wet mount  
 269 microscopy, no schistosomiasis cases were detected, possibly due to the reduced sensitivity compared  
 270 to point-of-care CCA tests or microscopic quality issues. After introduction of the intervention, 16 tests  
 271 were performed using CCA test kits, three of which were positive. As a result of the intervention the  
 272 case detection rate increased from 0% to 18.75%.

273 In Buge health centre, before the intervention pilot, a total of 83 stool examinations were performed  
 274 using microscopy, with only one case positive for schistosomiasis. After the intervention pilot a total  
 275 of 181 CCA tests were performed, of which 65 schistosomiasis cases were detected. As a result of the  
 276 intervention the case detection rate increased from 1.2% to 35.91%. These results are summarised in  
 277 Table 3.

278 **Table 3. Schistosomiasis case positivity rate before and after intervention implementation.**

| Health facility | Baseline (Microscopy) |       |                     | Endline (CCA) |       |                     |
|-----------------|-----------------------|-------|---------------------|---------------|-------|---------------------|
|                 | Tested                | Cases | Positivity rate (%) | Tested        | Cases | Positivity rate (%) |
| Boditi Hospital | 942                   | 0     | 0.00                | 16            | 3     | 18.75               |

|                    |      |   |      |     |    |       |
|--------------------|------|---|------|-----|----|-------|
| Buge Health Centre | 83   | 1 | 1.20 | 181 | 65 | 35.91 |
| Total              | 1025 | 1 | 0.09 | 197 | 68 | 34.52 |

279

280 **DHIS2 disease reports**

281 Prior to the intervention, target NTDs were not reported in DHIS2 reporting forms at Boditi hospital  
 282 or Buge health centre. However, after the intervention, 3 schistosomiasis cases and 3 trachoma cases  
 283 at Boditi hospital and 51 schistosomiasis cases at Buge health centre were reported. No lymphatic  
 284 filariasis or podoconiosis cases were recorded during the reporting period at either health facility.  
 285 However, this is because these diseases are not included in the DHIS2 disease reporting tool.

286 **DHIS2 service delivery reports**

287 Results of NTD service delivery data, which are reported electronically through DHIS2 on a quarterly  
 288 basis, are presented in Table 4. At Boditi hospital, there were no reported NTD services before the  
 289 intervention, however lymphedema management and trichiasis surgery were initiated after the six-  
 290 month pilot period. At Buge health centre, the lymphedema management and trichiasis surgery were  
 291 intensified after the intervention period, with the number of lymphedema cases increasing fivefold.  
 292 There were no hydrocele operations reported at Boditi hospital or Buge health centre before or after  
 293 the intervention.

294 [Table 4. NTD service delivery before and after intervention implementation.](#)

| Health facility    | Baseline              |                      |                      | Endline               |                      |                      |
|--------------------|-----------------------|----------------------|----------------------|-----------------------|----------------------|----------------------|
|                    | Lymphedema management | Trichiasis surgeries | Hydrocele operations | Lymphedema management | Trichiasis surgeries | Hydrocele operations |
| Boditi hospital    | 0                     | 0                    | 0                    | 12                    | 5                    | 0                    |
| Buge health centre | 49                    | 26                   | 0                    | 283                   | 38                   | 0                    |
| Total              | 49                    | 26                   | 0                    | 295                   | 43                   | 0                    |

295

296 **Health post data**

297 There is no formal system for recording and reporting disease data at the health post level, therefore  
 298 monthly parallel reporting forms were developed as part of the intervention. For this reason no

299 suspected target NTDs were recorded before the intervention period. After the provision of parallel  
 300 reporting forms and training on their use, all health posts initiated recording suspected NTD cases and  
 301 referral to the nearest health centre. The suspected cases recorded before and after the intervention  
 302 implementation are shown in Table 5.

303 **Table 5. suspected NTD cases reported at health posts before and after intervention implementation.**

|                            | <u>Buge HP</u> |      | <u>S. Shone</u> |      | <u>Damot Offa</u> |      | <u>H. Burkuto</u> |      | <u>H. Kontola</u> |      |
|----------------------------|----------------|------|-----------------|------|-------------------|------|-------------------|------|-------------------|------|
|                            | Pre            | Post | Pre             | Post | Pre               | Post | Pre               | Post | Pre               | Post |
| Intestinal schistosomiasis | 0              | 0    | 0               | 2    | 0                 | 0    | 0                 | 12   | 0                 | 4    |
| Trachoma                   | 0              | 10   | 0               | 1    | 0                 | 19   | 0                 | 14   | 0                 | 8    |
| Lymphatic filariasis       | 0              | 0    | 0               | 0    | 0                 | 0    | 0                 | 0    | 0                 | 0    |
| Podoconiosis               | 0              | 7    | 0               | 5    | 0                 | 8    | 0                 | 11   | 0                 | 8    |
| Total                      | 0              | 17   | 0               | 8    | 0                 | 27   | 0                 | 37   | 0                 | 20   |

304 Buge HP = Buge Health Post, S. Shone = Shakiso Shone, H. Burkuto = Harto Burkuto, H. Kontola = Harto Kontola

### 305 **Key informant interviews**

306 The following results are from KIIs held with health staff and community members. Health staff  
 307 included those at the health post, health centre and hospital level who were involved in either the  
 308 detection, management or reporting of NTDs at their health facility and were exposed to the  
 309 intervention during implementation. Community members included both those living with and  
 310 without disability caused by the target NTDs.

### 311 **Acceptability and usability of training materials received by health staff**

312 Most participants received materials during the training, including guidelines on NTD detection,  
 313 management and follow-up, manuals, registration books, referral forms and job aids. Materials were  
 314 used regularly to assist with NTD detection and management, to advise other staff and to determine  
 315 the appropriate drug dosage. Participants described the materials as clear, easy to understand, user-



316 friendly and informative. Most agreed that the materials contained a sufficient amount of information  
317 and adequately considered non-NTDs (e.g. malaria), aided accurate NTD diagnosis, and reduced the  
318 risk of under- or over-diagnosis. Suggestions for improvement were the inclusion of targets (e.g. how  
319 much follow-up a case should have), possible complications and other diseases with overlapping  
320 symptoms to aid differential diagnosis. Many expressed that training should be given continuously to  
321 ensure the sustainability of learnings and regular review meetings should be held to assess the impact  
322 on daily activities.

323 *“I was using this manual to remember what I learned and in the case of detection as guiding tools,*  
324 *also as a reference to manage the cases most of the time podoconiosis.”* (Health worker, Buge health  
325 centre)

326 *“They are also easy to use. They came in Amharic, they are easy for us. The content is good.”* (HEW,  
327 Buge rural health post)

328 *“It should be given in sustainable manner, it should not be done in campaign for a week... there*  
329 *should be continuous follow up after the end of training because one time event may not last long.”*  
330 (Health worker, Boditi Hospital)

### 331 **Health staff and community member perceptions of tasking health workers with NTD** 332 **management**

333 Overall perceptions were positive, with most believing health workers have sufficient capacity to  
334 manage NTDs. It was felt that as they are present in the communities and many individuals are  
335 reluctant to seek care at higher health facilities due to financial and physical barriers, this will improve  
336 access to healthcare. Challenges raised mainly related to additional workload and a lack of resources  
337 such as drugs, equipment and staff. Future recommendations included training healthcare staff to  
338 address knowledge gaps, conducting community outreach activities to access patients in rural areas  
339 and strengthening collaboration with key stakeholders to raise community awareness of NTDs.

340 *“This work put an additional burden on health workers at all levels, in my point of view we were*  
341 *performing very well.”* (Health worker, Buge health centre)

342 *“To do this work it needs community engagement, strong integration or linkage with health post,*  
343 *health centre and hospital and support from woreda and NGO.”* (HEW, Shakiso Shone health post)

344 Community member perceptions on tasking HEWs with NTD control were mixed. For some, “it is a  
345 very good thing”, they should be encouraged to do so and “we need to support them to identify those  
346 cases and bring them to health facilities”. Others did not foresee any challenges and believed that as  
347 people are aware of the benefits of seeking care and being educated on NTDs, they will be willing to  
348 listen to and cooperate with the HDA and HEWs. Although supportive of the idea, some participants  
349 mentioned the need to ensure all the necessary resources are available beforehand, such as drugs and  
350 equipment. However, a few community members had negative perceptions, describing how NTD-  
351 related problems are beyond the capacity of the HDA and HEWs and “they can’t treat such problems”.  
352 For a community member with disability, the additional task would not have a positive impact on  
353 health outcomes as drugs will still remain unaffordable for many. A CMWO believed that the HDA are  
354 not able to “differentiate and diagnose people who develop disability”.

355 *“Problems like mine are beyond their capacity. They can’t do anything about that. It is beyond what*  
356 *they can do.”* (Male community member with disability)

357 *“Both health extension workers and the HDA can manage NTD cases if the equipment is available.”*  
358 (Female community member without disability)

### 359 **Health staff perceptions of the intervention**

360 The vast majority of health workers felt confident to perform NTD responsibilities during the  
361 intervention, mainly due to the training and materials received. However, a small proportion of HEWs  
362 did not feel fully confident due to the training being “too short”. Most participants also believed in the  
363 intervention’s approach for ensuring reliable NTD detection and noticed an improvement in patient  
364 outcomes. The main challenge spanning all four NTDs was the shortage of drugs and equipment to

365 perform tasks. The impact on workload was also raised, except for schistosomiasis, which resulted in  
366 many health staff feeling this may affect the sustainability of the intervention.

367 *“I am ready to handle any case according to the training I took. Every professional should treat*  
368 *patients according to the training they took and everybody should treat.”* (Health worker, Buge  
369 health centre)

370 *“There is workload due to the human resource scarcity and the trained health professionals have*  
371 *double responsibility.”* (Health worker, Boditi Hospital)

372 *“For the other problems it is better if we get training again. Also health workers as well as other*  
373 *health officers should support us.”* (HEW, Buge Rural health post)

#### 374 **Recommendations for NTD integration into primary healthcare**

375 Health staff made several recommendations for integrating the detection, management, recording  
376 and reporting of NTDs into primary healthcare. These included having health workers and community  
377 leaders conduct awareness-creation activities within communities to “use every opportunity to deliver  
378 messages that can bring significant change”. Ensuring the necessary supplies (e.g. drugs and  
379 equipment) are available was frequently highlighted as an important factor to ensure the  
380 sustainability of NTD services. It was suggested that drugs and services should be provided free of  
381 charge as those susceptible to NTDs are often of low socioeconomic status, which may in turn  
382 encourage more healthcare-seeking. Having a dedicated focal person “who will work only on NTD-  
383 related issues at each level” to reduce the work burden on HEWs was also raised, this focal person  
384 should be incentivised to boost their motivation. Other recommendations included continuous  
385 support and follow-up on health workers from higher bodies and non-governmental organisations and  
386 regular trainings. This should also involve kebele leaders. Review meetings to evaluate these activities,  
387 including experience-sharing between different kebeles may facilitate future improvements in service  
388 provision. For one health worker, cooperation within the primary healthcare system and having a well-  
389 structured health post-hospital linkage was critical.

390 *“Services should be given in a continuous manner as part of routine services to sustain the*  
 391 *intervention results. The data which are being reported to higher bodies should also be evaluated like*  
 392 *other services.”* (Health worker, Boditi Hospital)

393 *“When the healthcare worker is taking history he has to check if there are any signs and symptoms*  
 394 *related to NTDs and take action. This is how the services should be integrated.”* (Laboratory  
 395 technician, Buge health centre)

## 396 **Cost-effectiveness analysis**

### 397 **Intervention cost**

398 A summary of the average total costs is shown in Table 6. Accordingly, the cost of the intervention is  
 399 summarised as: total capital (130,310 birr) and total recurrent (19,577,101 birr). The overall total adds  
 400 up to 19,708,411 birr or USD 450,478 based on the exchange rate of 1 USD to 43.75 birr that prevailed  
 401 in the first week of July 2021. Using a total beneficiary population of 302,842, the per-capita unit cost  
 402 of the intervention is calculated to be USD 1.49.

403 **Table 6. Total and unit costs of intervention implementation.**

|                                     | Boditi hospital | Buge health centre |
|-------------------------------------|-----------------|--------------------|
| Capital (birr)                      |                 |                    |
| Equipment                           | 9 660.00        | 16 650.00          |
| Transportation rental               | 60 000.00       | 45 000.00          |
| Total capital costs                 | 69 660.00       | 61 650.00          |
| Recurrent (birr)                    |                 |                    |
| Personnel                           | 15 472 056.48   | 3 649 728.00       |
| Supplies                            | 115 180.12      | 157 916.40         |
| Vehicle operation and maintenance   | 125 120.00      | 52 100.00          |
| Building operation and maintenance  | 5 000.00        | -                  |
| Total recurrent costs               | 15 717 356.60   | 3 859 744.40       |
| Total annual costs (birr)           | 15 787 016.60   | 3 921 394.40       |
| Overall total annual costs (birr)   | 19 708 411.00   |                    |
| USD equivalent (1 USD = 43.75 birr) | 450 477.96      |                    |

404

405 **Outcome of integration**

406 The main outcome measures at baseline and endline are shown in Table 7. The main outcome  
 407 measures used for the effectiveness calculation included: the proportion of NTD assessments  
 408 demonstrating adherence to target NTD intervention procedures by health workers (primary); the  
 409 proportion of change in health workers' ability to detect target NTDs over time (secondary); the  
 410 proportion of change in health workers' ability to detect and manage target NTDs over time (secondary);  
 411 and the proportion of health workers and HEWs who can adequately detect and record target NTDs  
 412 at the end of the intervention period (secondary). These measures are again converted to gains in  
 413 years of life lived without disability (gains in YLL) based on the Global Burden of Diseases Study for  
 414 Ethiopia for 2017 [18].

415 **Table 7. Main outcome measures at baseline and endline.**

| Indicator                                                                            | Baseline (%) | Endline (%) | Percentage point difference (%) |
|--------------------------------------------------------------------------------------|--------------|-------------|---------------------------------|
| NTD assessments demonstrating adherence to intervention procedures by health workers | 72.1         | 77.5        | 5.4                             |
| Health workers able to detect target NTDs                                            | 81.8         | 92.1        | 10.3                            |
| Health workers able to detect and manage target NTDs                                 | 81.8         | 81.2        | -0.6                            |
| Health workers and HEWs able to detect and record target NTDs                        | 81.8         | 87.1        | 5.3                             |
| Correctly diagnosed NTDs                                                             | 0.09         | 34.52       | 34.43                           |

416

417 **Cost-effectiveness of service integration**

418 Assuming the effectiveness of the intervention (gains in health workers' ability to detect NTDs) to be  
 419 34.43, the cost-effectiveness ratio of the intervention would be 21.23 (730.94/34.43). This ratio  
 420 (730.94) results from dividing the total annual cost of intervention (USD 450,478) by the estimated  
 421 decrease in DALYs lost (616.3) due to the increased ability of detection that came about following the  
 422 integrated interventions. Based on comparison with the mean per-capita GDP prevailing at the period  
 423 of project implementation (the willingness-to-pay threshold of one times the GDP per capita), the  
 424 intervention can be considered cost-effective since the per capita cost of 730.94 USD is below the GDP

425 per capita (USD 936.34) that prevailed during the intervention period. The input parameters for the  
 426 cost-effectiveness model are outlined in Table 8. The cost-effectiveness model is shown in Figure 1.

427 **Table 8. Input parameters for the cost-effectiveness model.**

| Input parameters                                                | Value                 | Source    |
|-----------------------------------------------------------------|-----------------------|-----------|
| DALYs lost in Ethiopia due to all NTDs (per 100,000 population) | 591                   | [18]      |
| Intervention catchment population                               | 302 842               | Primary   |
| Expected loss of DALYs due to NTDs in the catchment population  | 1 790                 | Estimated |
| Gains in health workers' ability to detect target NTDs (%)      | 34.43 (34.52-0.09)    | Primary   |
| Decrease in DALYs lost due to increased ability to detect NTDs  | 616.3 (1790*0.3443)   | Estimated |
| Total cost of intervention (birr)                               | 19 708 411            | Primary   |
| Total cost of intervention (USD equivalent) (1 USD = 43.75)     | 450 478               | Primary   |
| Cost per decrease in DALYs (USD)                                | 730.94 (450478/616.3) | Estimated |
| Comparative cost per DALYs for non-intervention (USD)           | 1                     | Assumed   |
| Cost-effectiveness (cost per DALYs/gains in ability to detect)  | 21.23 (730.94/34.43)  | Estimated |
| GDP per capita in Ethiopia (2020) = WTP                         | 936.34                | [19]      |

428

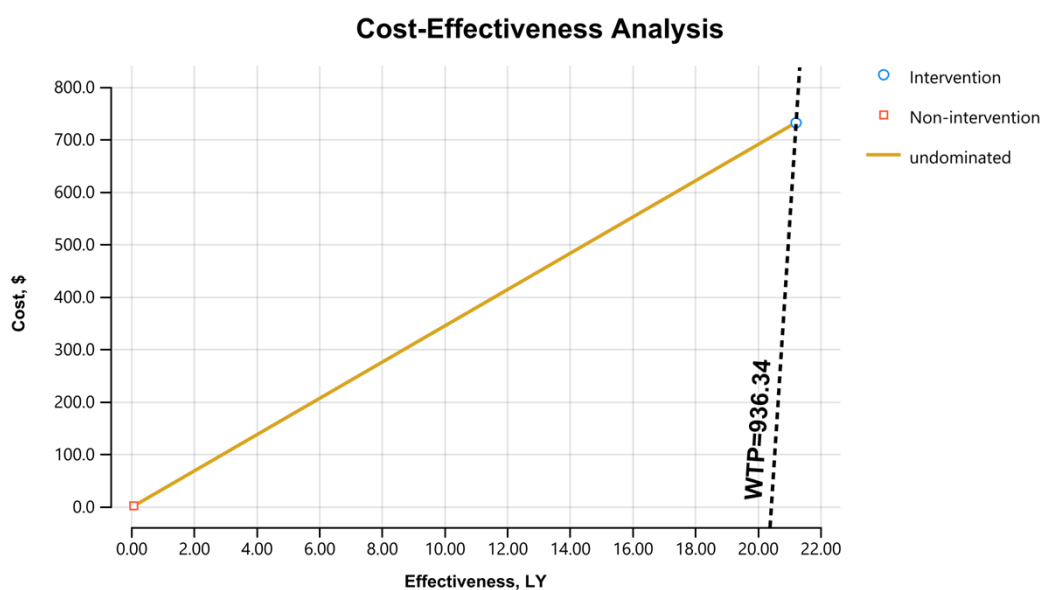

429

430 **Figure 1. Cost-effectiveness model.**

### 431 Discussion

432 Overall, results from the study were promising. The health system capacity assessment revealed  
 433 encouraging changes in the functions of the study hospital and health centers after the  
 434 implementation of the intervention. Results showed that target NTD service delivery improved after

435 the six-month intervention pilot, particularly in lymphoedema case management for lymphatic  
436 filariasis and podoconiosis, which can be attributed to the provision of training, job aids, drugs,  
437 supplies and materials. This reflects a similar result from the recent EnDPoINT study, also conducted  
438 in Ethiopia, which highlighted the need for continuous on-the-job training and supervision to maintain  
439 quality service delivery [13].

440 The study found there is a need for improved M&E data collection and analysis to support improved  
441 NTD case management. Overall, data on the target NTDs showed remarkable improvements post-  
442 intervention, which can be attributed to the positive impact of the intervention on service delivery.  
443 For example, there was a dramatic increase in the number of schistosomiasis cases detected at  
444 hospital and health centre level, from one case (with microscopy) pre-pilot intervention, to 68 cases  
445 through CCA tests during the intervention implementation, demonstrating the improved sensitivity of  
446 the tests. However, a significant disparity between laboratory data and data reported through DHIS2  
447 was observed pre- and post-intervention at Buge health centre, which may be attributable to errors  
448 in recording and reporting. Furthermore, the number of trachoma cases reported through DHIS2  
449 appeared relatively low, considering the intervention areas are trachoma-endemic. Further  
450 investigation for corrective action is needed to fully understand this.

451 Our study demonstrated increases in the reporting of suspected schistosomiasis and trachoma cases  
452 at health posts, however further study is needed to determine the intervention's impact on the  
453 reporting of suspected lymphatic filariasis. In addition, further effort is needed to advocate for the  
454 integration of podoconiosis into the DHIS2 reporting platform. Given the importance of effective and  
455 efficient data reporting highlighted by the study, due attention is needed at Ministry of Health level  
456 to include NTD case reporting at the health post level, as this will enable the true burden of NTDs to  
457 be documented and the proper referral and management of cases tracked. This was further  
458 highlighted by a recent study conducted in Kenya, which also showed low-performance surveillance  
459 in relation to NTDs and the need to strengthen this going forward [20]. Similarly, work done by

460 Sightsavers in Ethiopia calls for the improved use of surveillance and data integration to eliminate  
461 trachoma [21].

462 The study found improvements in the primary outcome, adherence to target NTD intervention  
463 procedures by health workers over time, with a 5.4 percentage point improvement between baseline  
464 and endline (from 72.1% to 77.5%). This was slightly lower than expected and could have been due to  
465 the influence of the pandemic on service delivery, with many health systems suffering from service  
466 delivery issues during this period [22]. However, when specifically observing the ability to detect target  
467 NTDs over time, a notable increase of over 10% was discovered. This could reflect the focus on  
468 diagnosis as part of the intervention and the provision of improved diagnostics, as well as job aids.  
469 These results reflect the findings from other recent work conducted to support NTD case management  
470 [23]. These results are further supported by looking at the associated actions over time, such as  
471 consulting job aids (increased from 60.5% to 83.7%) and the use of the appropriate job aid for the age  
472 group (increased from 60.5% to 80.6%).

473 The qualitative findings demonstrated widespread acceptability of the intervention by health workers  
474 and HEWs at the end of the intervention period, and participants reported increases in knowledge and  
475 skills, and positive perceptions of the job aids' ease of use. Many health workers reported feeling  
476 confident managing NTDs since the training, however others said additional training would be  
477 beneficial. Health staff and community members also mentioned some persisting contextual barriers  
478 that could affect the effectiveness of the intervention. These barriers included: a lack of human  
479 resources, the availability of equipment and the affordability of treatment.

480 Considering 'gains in health workers' ability to detect target NTDs' as a main outcome measure, there  
481 was a 34.43% percentage point increase. The difference (as measured in total DALYs averted) amounts  
482 to a gain of 616.3 life years among beneficiaries in the catchment area of the programme, and the  
483 cost-effectiveness ratio of the intervention is 21.23 (730.94/34.43). Therefore, as the per capita cost  
484 of the intervention (USD 730.94) is less than the mean per capita GDP prevailing during the  
485 intervention period (USD 936.34), the intervention can be considered cost-effective.



486 Overall, the findings from this study highlight the need for further investment and consideration of  
487 integrating and scaling up NTD interventions at the primary healthcare level in Ethiopia, and that  
488 providing a package of interventions to support integration can be a cost-effective method. Routine  
489 health services for morbidity management and disability prevention caused by NTDs are still lacking,  
490 even though they impose a huge burden on affected individuals and their communities in terms of  
491 physical and mental health, and psychosocial and economic outcomes. More must be done to improve  
492 the prevention, diagnosis, treatment and management for these diseases to move towards national  
493 and global goals to eliminate NTDs and achieve universal health coverage. NTDs also  
494 disproportionately affect women and efforts to reduce the incidence of these diseases will also help  
495 to redress gender inequalities that persist in health.

#### 496 **Limitations**

497 The study was postponed by six months due to the COVID-19 pandemic and data collection methods  
498 were adapted to respect infection prevention and control measures. Focus group discussions were  
499 replaced with KIIs to limit person-to-person contact, which meant fewer participants were recruited  
500 due to time limitations, resulting in a narrower range of views and opinions being captured. The  
501 pandemic also hindered the full sample size being obtained in the initial assessments, however, this  
502 was compensated for by over-achieving the sample size in the final assessments. The research team  
503 worked hard with the district, regional and national health officials to ensure medicines and supplies  
504 were allocated to the research site, however, stock-outs were occasionally experienced. When this  
505 occurred, the team procured the necessary items as required. The comparison of CCA and microscopy  
506 to determine schistosomiasis case positivity rate pre- and post-implementation of the intervention,  
507 with the increased detection possibly due to the increased sensitivity of point-of-care CCA tests  
508 compared to microscopy, opposed to other intervention factors.

## 509 **Conclusion**

510 The capacity of all enrolled health facilities for detecting, managing and recording target NTDs,  
511 through the introduction of the intervention, improved over time. Similarly, the use of intervention  
512 materials by health workers and HEWs increased over the intervention period. The intervention tools  
513 proved to be highly acceptable to health workers and HEWs, who viewed them as helpful, relevant  
514 and easy to use. Furthermore, patients and caregivers appeared to be satisfied with the new NTD  
515 services offered at the different levels of the health system. The intervention was also seen to improve  
516 care-seeking behaviours over time and be cost-effective.

517 To strengthen the detection, management and reporting of target NTDs in Ethiopia health workers  
518 and HEWs should continue to receive regular training and supportive supervision. Support to ensure  
519 sustainable, robust routine data collection for NTDs must also continue. Further work is needed to  
520 evaluate the feasibility and effectiveness of this intervention using a hybrid effectiveness-  
521 implementation evaluation design. Further work is also needed to integrate podoconiosis and  
522 lymphatic filariasis into the DHIS2 reporting system to ensure the effective management and reporting  
523 of these diseases.

524

## 525 **Funding**

526 This work received financial support from the Coalition for Operational Research on Neglected  
527 Tropical Diseases, which is funded at The Task Force for Global Health primarily by the Bill & Melinda  
528 Gates Foundation, by the United States Agency for International Development through its Neglected  
529 Tropical Diseases Program, and with UK aid from the British people.

## 530 Acknowledgements

531 We would like to thank all the health workers of Boditi primary hospital, Buge health centre and the  
532 health posts who participated in the study, along with the community members of Damot Gale  
533 woreda. Thank you to both partners of the study; the Federal Ministry of Health and the Health Bureau  
534 of the Southern Nations, Nationalities and Peoples' Region. Authors would especially like to thank Lisa  
535 Chestnutt and Ani Steele for their support in finalising this manuscript.

## 536 Supplementary information

### 537 S1 – Table

538 Table 1. Characteristics of patients enrolled in the baseline and endline assessment.

| Variable                    |               | Baseline   | Endline     |
|-----------------------------|---------------|------------|-------------|
| <i>Health facility type</i> | Hospital      | 10 (23%)   | 45 (34.9%)  |
|                             | Health centre | 21 (49%)   | 58 (45%)    |
|                             | Health post   | 12 (28%)   | 26 (20.2%)  |
| <i>Sex</i>                  | Female        | 23 (53.5%) | 74 (57.4%)  |
|                             | Male          | 20 (46.5%) | 55 (42%)    |
| <i>Age category</i>         | <5            | 4 (9.3%)   | 18 (14%)    |
|                             | 5-15          | 2 (4.7%)   | 11 (8.5%)   |
|                             | 15+           | 37 (86%)   | 100 (77.5%) |
| Total                       |               | 43         | 129         |

## 539 References

1 World Health Organization. Integrating neglected tropical diseases into global health and development: fourth WHO report on neglected tropical diseases. [Internet]. Geneva: World Health Organization; [Cited 2023 April 04]. Available from: <https://apps.who.int/iris/handle/10665/255011>

2 World Health Organization. Accelerating work to overcome the global impact of neglected tropical diseases : a roadmap for implementation : executive summary. [Internet]. Geneva: World Health Organization; [Cited 2023 April 04]. Available from: <https://apps.who.int/iris/handle/10665/70809>

3 World Health Organization. SDG indicator metadata. 2022.

---

4 World Health Organization. Ending the neglect to attain the Sustainable Development Goals: A road map for neglected tropical diseases 2021–2030. [Internet]. Geneva: World Health Organisation; 2021 January 28 [Cited 2023 April 04]. Available from: <https://www.who.int/publications/i/item/9789240010352>

5 Correction: Neglected tropical diseases and the sustainable development goals: an urgent call for action from the front line. *BMJ Glob Heal*. 2019;4(2): e001334corr1.

6 Federal Ministry of Health of Ethiopia. The Third National Neglected Tropical Diseases Strategic Plan 2021-2025. [Internet]. Addis Ababa: Federal Ministry of Health of Ethiopia; 2022 [Cited 2023 April 04]. Available from: <https://espen.afro.who.int/system/files/content/resources/Third%20NTD%20national%20Strategic%20Plan%202021-2025.pdf>

7 Federal Ministry of Health of Ethiopia. Second Edition of National Neglected Tropical Diseases Master Plan for Ethiopia. [Internet]. Addis Ababa: Federal Ministry of Health of Ethiopia; 2016 [Cited 2023 April 04]. Available from: <https://www.afro.who.int/publications/second-edition-national-neglected-tropical-diseases-master-plan-ethiopia-2016>

8 Ayode D, Tora A, Farrell D, Tadele G, Davey G, McBride CM. Dual perspectives on stigma: reports of experienced and enacted stigma by those affected and unaffected by podoconiosis. *J Public Health Res*. 2016; 5(2): 689.

9 Vlassoff C, Weiss M, Ovuga EB, Eneanya C, Nwel PT, Babalola SS et al. Gender and the stigma of onchocercal skin disease in Africa. *Soc Sci Med*. 2000; 50: 1353–68.

10 Wharton-Smith A, Rassi C, Batisso E, Ortu G, King R, Endriyas M, et al. Gender-related factors affecting health seeking for neglected tropical diseases: findings from a qualitative study in Ethiopia. *PLoS Negl Trop Dis*. 2019;13 (12): e0007840.

11 World Health Organization, Alliance for Health Policy and Systems Research. Primary health care systems (primasys): case study from Ethiopia. WHO/HIS/HSR/17.31. [Internet] Geneva: World Health Organization; 2017 [Cited 2023 April 04]. Available from: <https://apps.who.int/iris/handle/10665/341083>

12 Adera TH, Macleod C, Endriyas M, Dejene M, Willis R, Chu BK, et al. Prevalence of and Risk Factors for Trachoma in Southern Nations, Nationalities, and Peoples’ Region, Ethiopia: Results of 40 Population-Based Prevalence Surveys Carried Out with the Global Trachoma Mapping Project. *Ophthalmic Epidemiol*. 2016;23(sup1): 84–93.

13 Tesfaye A, Semrau M, Ali O, Kinfu M, Tamiru M, Fekadu A, et al. Development of an integrated, holistic care package for people with lymphoedema for use at the level of the Primary Health Care Unit in Ethiopia. *PLoS Negl Trop Dis*. 2021;15(4): e0009332.

14 Mota AA, Lachore ST, Handiso YH. Assessment of food insecurity and its determinants in the rural households in Damot Gale Woreda, Wolaita zone, southern Ethiopia. *Agric Food Secur*. 2019;8(1): 11.

15 Rassi C. Strengthening primary healthcare for neglected tropical diseases in Ethiopia. 2018 December 12 [Cited 20 April 2023]. In: Malaria Consortium [Internet]. Available from: <https://www.malariaconsortium.org/resources/publications/1190/strengthening-primary-healthcare-for-neglected-tropical-diseases-in-ethiopia>

16 Qotera. Ethiopian Census - 2017 Projection. 2017.

17 Braun V, Clarke V. Using thematic analysis in psychology. *Qual Res Psychol*. 2006;3(2): 77–101.

18 Global Burden of Disease Study 2017; [Cited 2023 April 04]. Database: Global Health Data Exchange [Internet]. Available from: <https://ghdx.healthdata.org/gbd-2017>

19 Atlas WD. Ethiopia - GDP per capita. 2020 [cited 20 April 2023]. In: Knoema [Internet]. Available from: <https://knoema.com/WBGS2019/gender-statistics?tsId=1499080>

20 Ng'etich AKS, Vayi K, Mutero CM. Assessment of surveillance core and support functions regarding neglected tropical diseases in Kenya. BMC Public Health. 2021;21(1): 142.

21 Kebede B. Is data integration the answer to eliminating trachoma in Ethiopia? 2020 December [Cited 04 April 2023]. In: Sightsavers [Internet]. Available from: <https://www.sightsavers.org/blogs/2020/12/data-integration-ethiopia>

22 Feldman M, Lacey Krylova V, Farrow P, Donovan L, Zandamela E, Rebelo J, et al. Community health worker knowledge, attitudes and practices towards COVID-19: Learnings from an online cross-sectional survey using a digital health platform, UpSCALE, in Mozambique. PLoS One. 2021;16(2): e0244924.

23 Ortu G, Williams O. Neglected tropical diseases: Exploring long term practical approaches to achieve sustainable disease elimination and beyond. Infect Dis Poverty. 2017;1: 6.
